# Supplementary material
Source: PubMed Central journal article supplement (PMC6269315)
Supplement: 2018_206029-Disclosures_and_Contributions.pdf [file 2018_206029-Disclosures_and_Contributions.pdf]

Haematologica  
HAEMATOL/2018/206029  
Version 1

Twisting the bone marrow stem cell niche

Haixia Niu and Jose A Cancelas

Disclosures: The authors declare no relevant conflicts of interest on support received for the work under consideration for publication. JAC declares research support for work outside the submitted work in the last 36 months from the National Institutes of Health, U.S. Dept. of Defense, Cerus Co., TerumoBCT, Cellphire Inc., Fresenius-Kabi, Hemanext Inc., Cytosorbents Inc., Haemonetics & Therapure Inc.

Contributions: HN wrote the first draft and figure sketch. JAC edited the draft twice, figure legend and approved the sketch for illustration.
